# Supplementary material for: Does Artificial Intelligence Make Clinical Decision Better? A Review of Artificial Intelligence and Machine Learning in Acute Kidney Injury Prediction
Source: MDPI journal article supplement (doi:10.3390/healthcare9121662), 2021-11-30
Supplement: s1 [file s1]

**Supplementary Table S1. Details of Search Strategy Source: Pubmed;  
Searched on: 01, Dec, 2020;**

| Search | Query                                      | Items  |
|--------|--------------------------------------------|--------|
| #1     | "acute kidney injury"[Mesh]                | 25357  |
| #2     | "acute kidney injury"[Title/Abstract]      | 37559  |
| #3     | "machine learning"[Title/Abstract]         | 39514  |
| #4     | "machine learning" [Mesh]                  | 24175  |
| #5     | "artificial intelligence" [Title/Abstract] | 11145  |
| #6     | "artificial intelligence" [Mesh]           | 107310 |
| #7     | <u>#1</u> OR <u>#2</u>                     | 59155  |
| #8     | <u>#3</u> OR <u>#4</u>                     | 49985  |
| #9     | <u>#5</u> OR <u>#6</u>                     | 113598 |
| #10    | <u>#8</u> OR <u>#9</u>                     | 133529 |
| #11    | #7 AND #10                                 | 145    |
